# Supplementary material for: One-Step, Low-Cost, Operator-Friendly, and Scalable Procedure to Synthetize Highly Pure N-(4-ethoxyphenyl)-retinamide in Quantitative Yield without Purification Work-Up
Source: MDPI journal article supplement (doi:10.3390/molecules27113632), 2022-06-06
Supplement: s1 [file s1]

# Supplementary Materials

## **One-step, Low-Cost, Operator-Friendly and Scalable Procedure to Synthesize Highly Pure N-(4-ethoxyphenyl)-retinamide in Quantitative Yield Without Purification Work-up.**

Silvana Alfei\* and Guendalina Zuccari\*

Department of Pharmacy (DIFAR), University of Genoa, Viale Cembrano, 4, 16148 Genoa, Italy

\*alfei@difar.unige.it (S.A.); Tel.: +39 010 355 2296; zuccari@difar.unige.it (G.Z.)

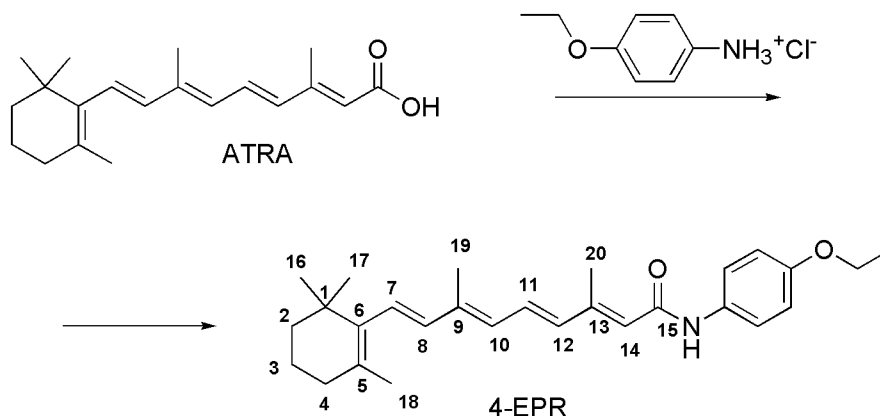

### Reaction Summary S1

Yield: 63%

- 1.1 Reagents: Hexachloroacetone, Triphenylphosphine
- Solvents: Tetrahydrofuran; 1 h, 0 °C
- 1.2 Reagents: Pyridine; 0 °C-rt; rt
- 1.3 Reagents: Tetrafluorophthalic anhydride; 20 - 25 min, rt
- 1.4 Solvents: Water; 15 min, rt
- 1.5 Solvents: Tetrahydrofuran; 1 h, rt

**By: Curley, Robert W., Jr.; et al**  
**World Intellectual Property Organization**  
**WO2003003987 A2 2003-01-16**

### Reaction Summary S2

Yield: Not available

- 1.1 Reagents: Oxalyl chloride
- Solvents: Et<sub>2</sub>O
- 1.2 Reagents: Degassed dry DMF; mild conditions
- Solvents: DMF; rt

**By: Maryanoff, Cynthia Anne**  
**European Patent Organization**  
**EP261911 A2 1988-03-30**

### Reaction Summary S3

Yield: 76%

- 1.1 Reagents: SOCl<sub>2</sub>, Pyridine
- Solvents: Et<sub>2</sub>O
- 1.2 Reagents: morpholine
- Solvents: Et<sub>2</sub>O

**By: Koenig, H.; et al**  
**From Ger. Offen. (1974), DE 2300107 A1 Jul 11, 1974**

### Reaction Summary S4

Yield: 63%

- 1.1 Reagents: Triphenylphosphine
- Solvents: Tetrahydrofuran
- 1.2 Reagents: Hexachloroacetone; 1 h, 0 °C
- 1.3 Reagents: Pyridine; 1 - 2 h, 0 °C-rt
- 1.4 Reagents: Tetrafluorophthalic anhydride
- 1.5 Solvents: Water
- 1.6 Reagents: Amberlite A 21

**By: Mershon, Serena M.; et al**  
**Bioorg. Med. Chem. Let. (2007), 17(3), 836-840**

### Reaction Summary S5

Yield: not available

- 1.1 Reagents: 1-Ethyl-3-(3'-dimethylaminopropyl)carbodiimide hydrochloride
- Solvents: Dichloromethane; 16 h, rt

**By: Campos-Sandoval, Jose Angel; et al**  
**J. Med. Chem. (2011), 54(13), 4378-4387**

**Scheme S1.** The three old patents (Reaction Summary S1, S2 and S3) and the generic procedures (Reaction Summary S4 and S5) existing for preparing 4-EPR before our work.

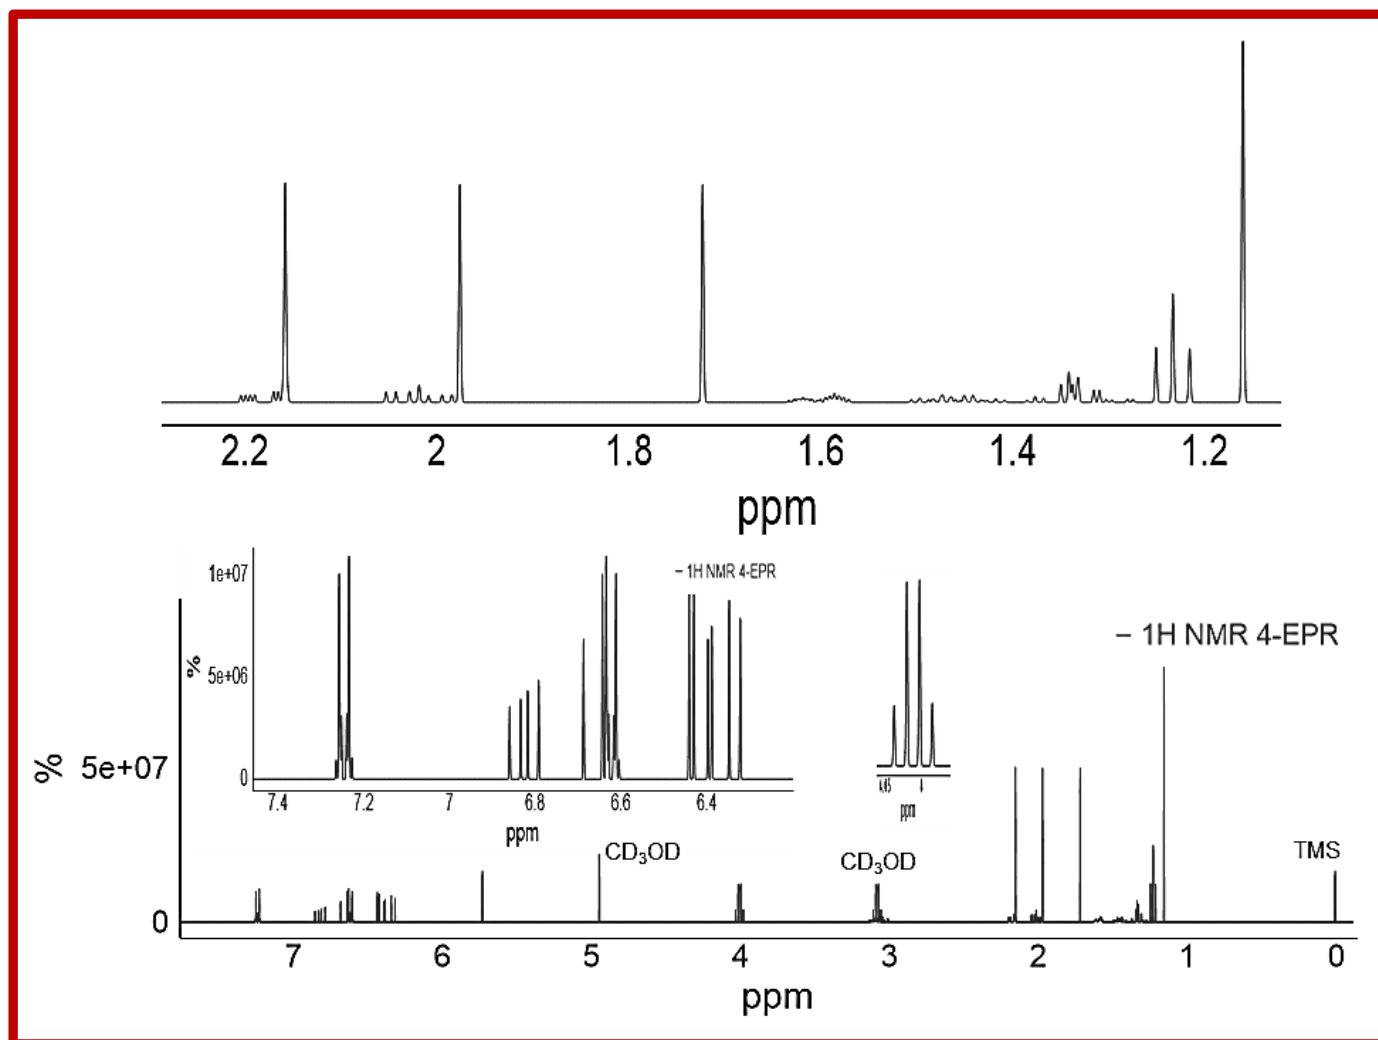

**Figure S1a.**  $^1\text{H}$  NMR spectrum with magnifications of significant regions (400 MHz,  $\text{CD}_3\text{OD}$ ) of 4-EPR carried out on a Jeol 400 MHz spectrometer (JEOL USA, Inc., Peabody, MA, USA).

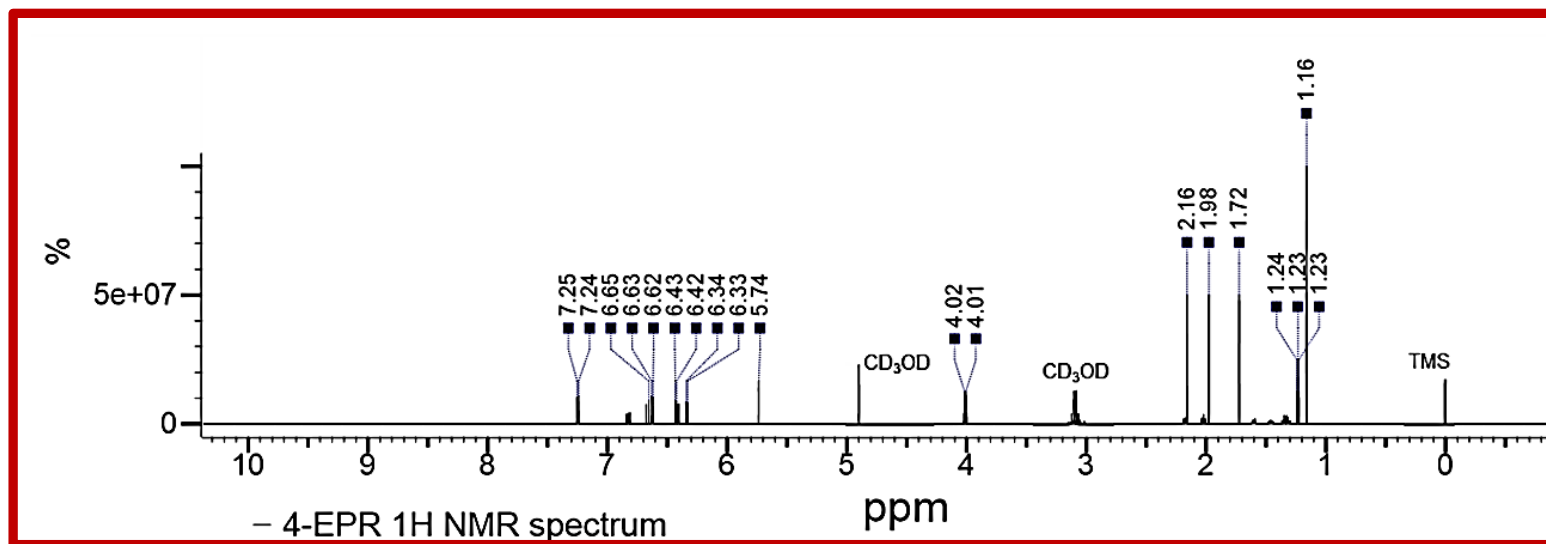

**Figure S1b.**  $^1\text{H}$  NMR analysis (400 MHz,  $\text{CD}_3\text{OD}$ ) of 4-EPR carried out on a Jeol 400 MHz spectrometer (JEOL USA, Inc., Peabody, MA, USA), including the chemical shifts (ppm) as provided by the instrument.

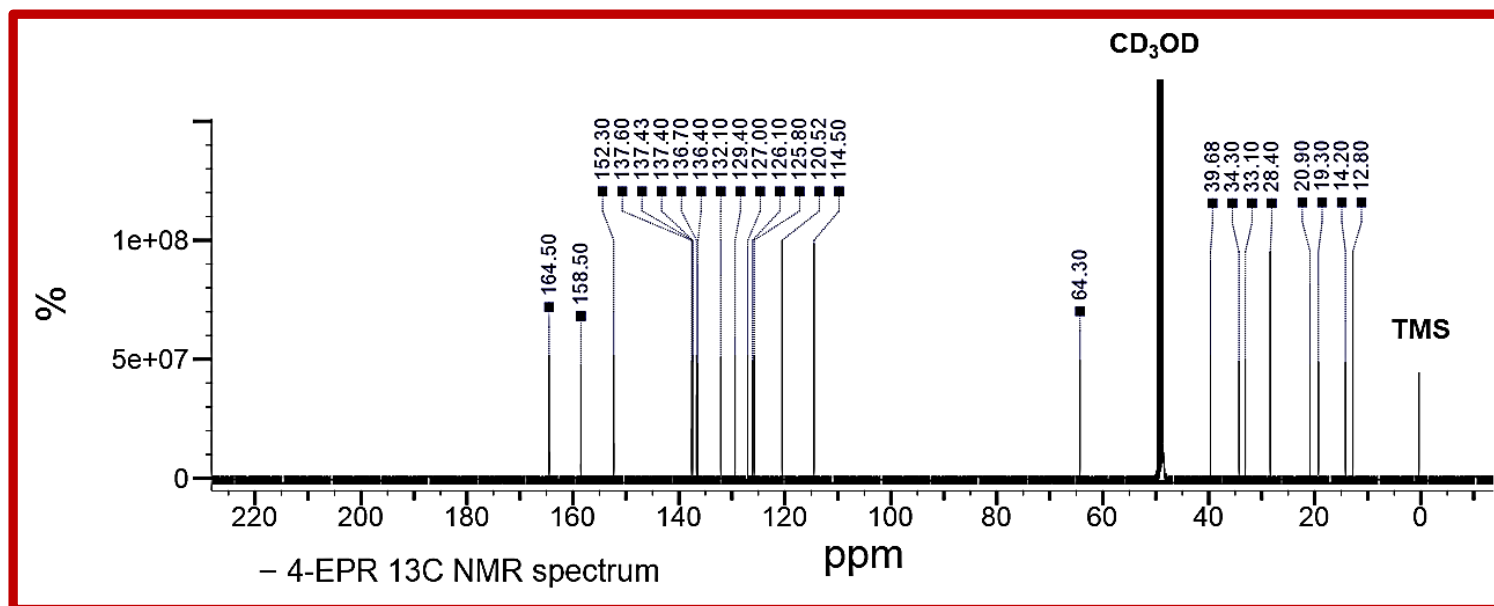

**Figure S2.**  $^{13}\text{C}$  NMR analysis (100 MHz,  $\text{CD}_3\text{OD}$ ) of 4-EPR carried out on a Jeol 400 MHz spectrometer (JEOL USA, Inc., Peabody, MA, USA), including the chemical shifts (ppm) as provided by the instrument.

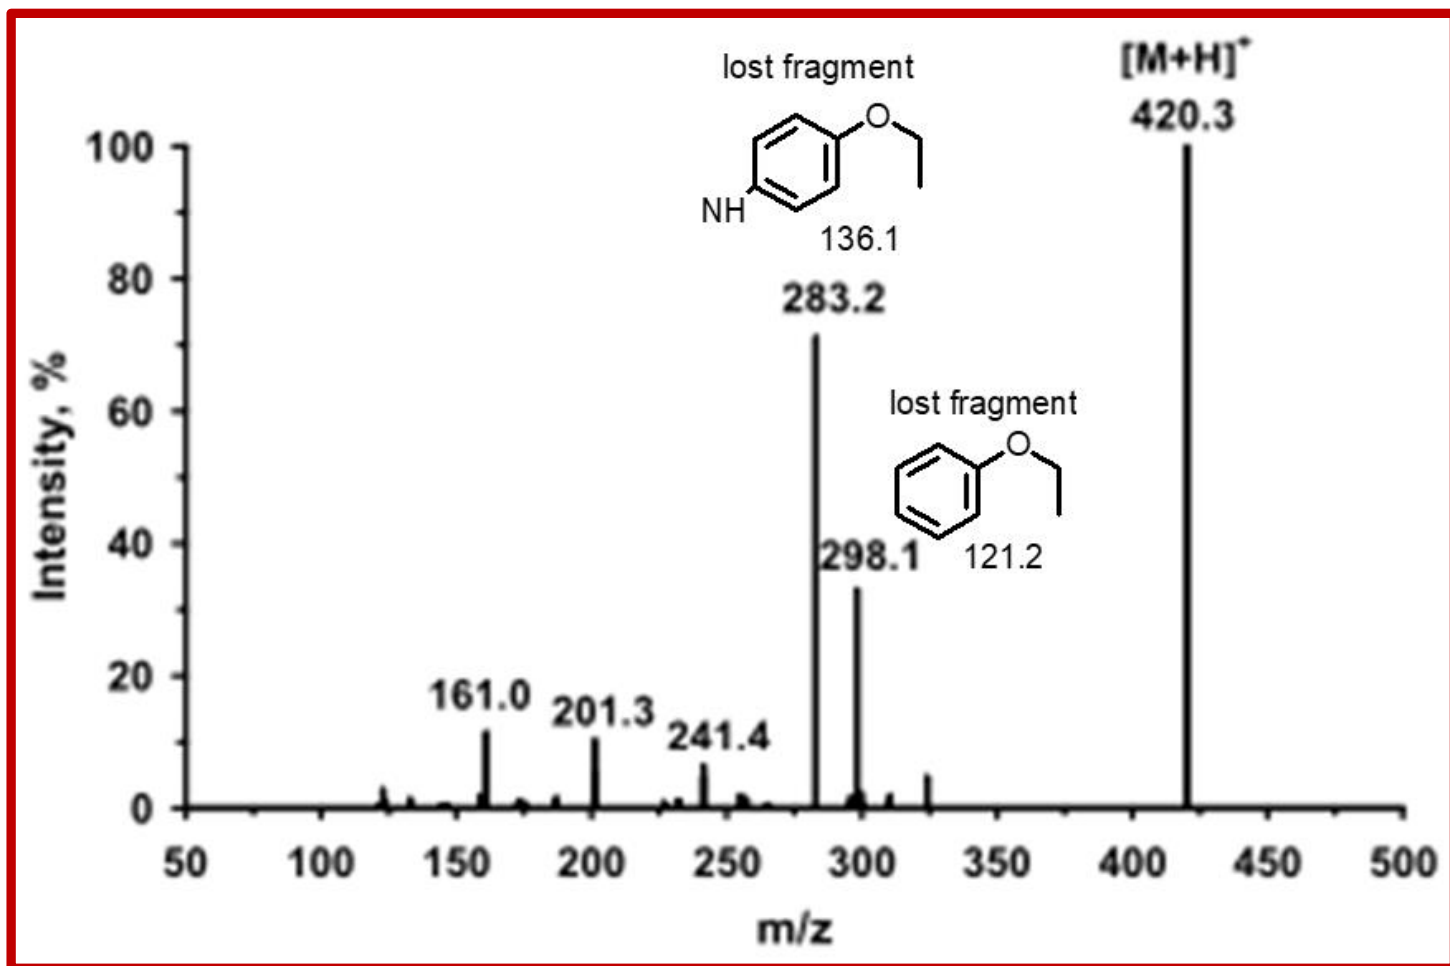

**Figure S3.** GC-MS spectrum of 4-EPR, obtained with an Ion Trap Varian Saturn 2000 instrument (CI mode, filament current 10 mA) equipped with a DB-5MS (J&W) 30 m, i.d. 0.32 mm, film 1  $\mu$ m capillary column.

## Section S2. Side product (BRAA)

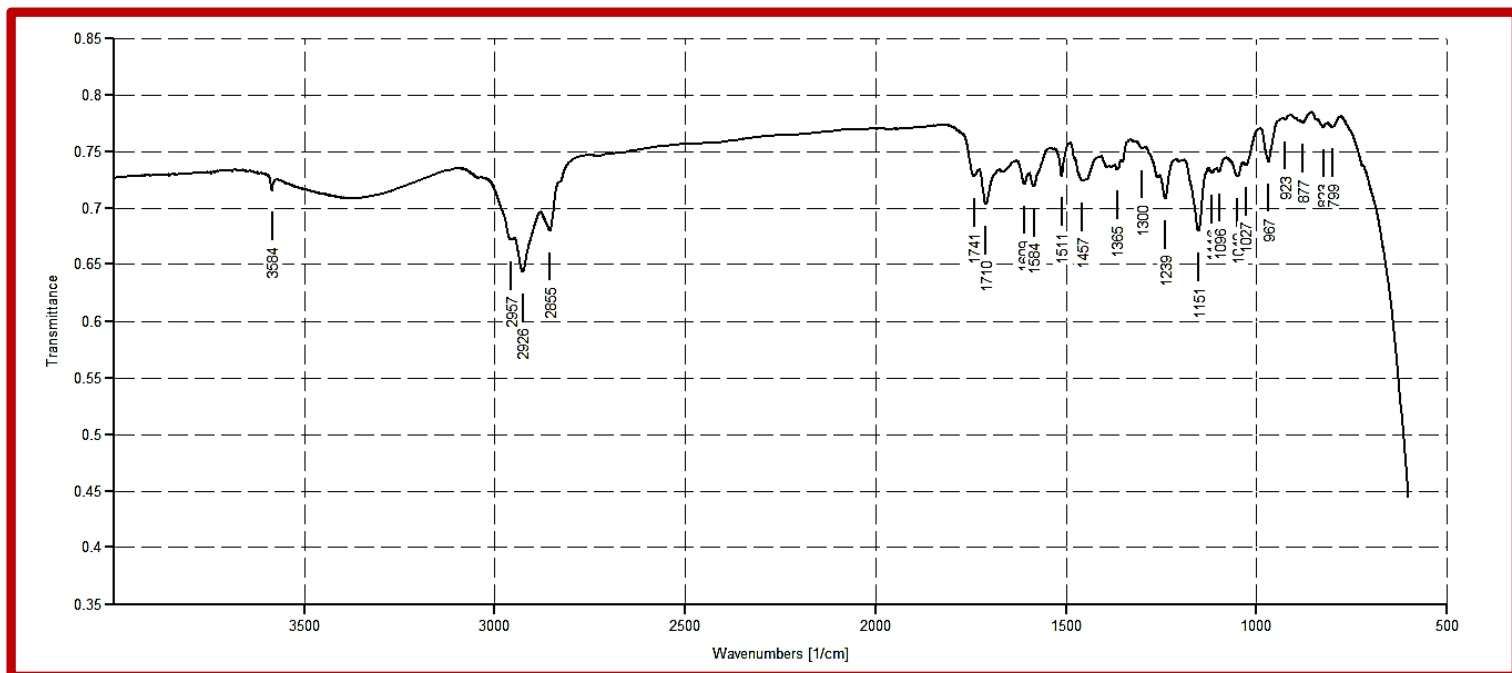

**Figure S4.** FTIR analysis (KBr) of BRAA, carried out using a Spectrum Two FT-IR Spectrometer (Perkin Elmer, Inc., Waltham, MA, USA). Acquisitions were made from 4000 to 600  $\text{cm}^{-1}$ , with 1  $\text{cm}^{-1}$  spectral resolution, co-adding 32 interferograms, with a measurement accuracy in the frequency data at each measured point of 0.01  $\text{cm}^{-1}$ , due to the internal laser reference of the instrument.
